# Supplementary material for: Inequalities in use of total hip arthroplasty for hip fracture: population based study
Source: PubMed Central journal article supplement (PMC4849171; doi:10.1136/bmj.i2021), 2016-04-28
Supplement: perd029647.ww1_default.pdf [file perd029647.ww1_default.pdf]

## **Appendix 1: Mobility Scores [posted as supplied by author]**

Version 7 and 8 of NHFD have different mobility scores

V7 therefore tracked onto V8

### **MOBILITY (VERSION 7 ONLY)**

WalkInside                      Walking Ability Indoors (**V7 only**)

- 0 Regularly walked without aids
- 1 Regularly walked with one aid
- 2 Regularly walked with two aids or frame
- 3 Wheelchair or bedbound
- 4 Unknown
- . Missing

WalkOutside                      Walking ability outside (**V7 only**)

- 0 Regularly walked without aids
- 1 Regularly walked with one aid
- 2 Regularly walked with two aids or frame
- 3 Wheelchair or bedbound
- 4 Never goes outdoors
- 5 Electric buggy
- 6 Unknown
- . Missing

AccompOutside      Accompanied to Walk Outside (**V7 only**)

- 0 No
- 1 Yes
- 2 Wheelchair or bedbound
- 3 Unknown
- 4 Never goes outdoors
- . Missing

AccompInside      Accompanied to Walk Inside (**V7 only**)

- 0 No
- 1 Yes
- 2 Wheelchair or bedbound
- 3 Unknown
- . Missing

### **MOBILITY VERSION 8 ONLY**

**Mobility              Pre-Fracture Walking Ability (VERSION 8 ONLY)**

- 1 Freely mobile without aids
- 2 Mobile outdoors with one aid
- 3 Mobile outdoors with two aids or frame

- 4 Some indoor mobility but never goes outside without help
- 5 Unknown
- 6 No functional mobility

### **V7 TRACKED ONTO V8**

**(variable name = mob)**

- 1 Freely mobile without aids (walkoutside 0)
- 2 Mobile outdoors with one aid (walkoutside 1)
- 3 Mobile outdoors with two aids or frame (walkoutside 2)
- 4 Some indoor mobility but never goes outside without help  
ANY WALKING INSIDE(0-2) AND ACCOMPANIEDOUTSIDE (1,2 and 4) OR ANYWALKING INSIDE(0-2) AND WALKINGOUTDOORS WHEEL/ BUGGY (3, 4,5)
- 5 No functional ability Wheelchair or bedbound inside (walkinside 3)
- 6 Unknown

### **STATA CODE**

replace mob=mobility

replace mob=5 if walkinside==3

replace mob=4 if (walkinside==0 & accompoutside==1)

replace mob=4 if (walkinside==1 & accompoutside==1)

replace mob=4 if (walkinside==2 & accompoutside==1)

replace mob=4 if (walkinside==0 & accompoutside==2)

replace mob=4 if (walkinside==1 & accompoutside==2)

replace mob=4 if (walkinside==2 & accompoutside==2)

replace mob=4 if (walkinside==0 & accompoutside==4)

replace mob=4 if (walkinside==1 & accompoutside==4)

replace mob=4 if (walkinside==2 & accompoutside==4)

replace mob=4 if (walkinside==0 & walkoutside==3)

replace mob=4 if (walkinside==1 & walkoutside==3)

replace mob=4 if (walkinside==2 & walkoutside==3)

replace mob=4 if (walkinside==0 & walkoutside==4)

replace mob=4 if (walkinside==1 & walkoutside==4)

replace mob=4 if (walkinside==2 & walkoutside==4)

replace mob=4 if (walkinside==0 & walkoutside==5)

replace mob=4 if (walkinside==1 & walkoutside==5)

replace mob=4 if (walkinside==2 & walkoutside==5)

replace mob=3 if walkoutside==2

replace mob=2 if walkoutside==1

replace mob=1 if walkoutside==0
