# Supplementary material for: Inequalities in use of total hip arthroplasty for hip fracture: population based study
Source: PubMed Central journal article supplement (PMC4849171; doi:10.1136/bmj.i2021), 2016-04-28
Supplement: perd029647.ww2_default.pdf [file perd029647.ww2_default.pdf]

## **Appendix 2: Hospitals contributing to database [posted as supplied by authors]**

### **Group 'X' Hospitals**

ADD. Addenbrookes Hospital  
AEI. Royal Albert Edward Infirmary  
AIR. Airedale General Hospital  
ASH. Wansbeck General Hospital  
BAR. Barnsley District General Hospital  
BAS. Basildon Hospital  
BAT. Royal United Hospital Bath  
BFH. Broomfield Chelmsford  
BOL. Royal Bolton Hospital  
BRD. Bradford Royal Infirmary  
BRG. Bronglais General Hospital  
BRI. Bristol Royal Infirmary  
CCH. Charing Cross Hospital  
CHE. Chesterfield Royal  
CHG. Cheltenham General Hospital  
COC. Countess of Chester Hospital  
CRG. Craigavon Area Hospital  
DAR. Darlington Memorial Hospital  
DGE. Eastbourne DGH  
DVH. Darent Valley Hospital  
EAL. Ealing Hospital  
EBH. Birmingham Heartlands Hospital  
ESU. East Surrey Hospital  
FAZ. University Hospital Aintree  
FGH. Furness General  
FRM. Frimley Park Hospital  
FRY. Frenchay Hospital  
GGH. Diana Princess of Wales Hospital  
GHS. Good Hope General Hospital  
GLO. Gloucestershire Royal Hospital  
GRA. Grantham And District General Hospital  
GWY. Ysbyty Gwynedd Hospital  
HAR. Harrogate District Hospital  
HCH. County Hospital Hereford  
HIN. Hinchingsbrooke Hospital  
HOM. Homerton Hospital  
HRI. Hull Royal Infirmary  
IOW. St Marys Hospital Newport  
JPH. James Paget Hospital

LDH. Luton & Dunstable Hospital  
LGH. Leighton Hospital  
LGI. Leeds General Infirmary  
LIN. Lincoln County Hospital  
LON. Royal London Hospital  
MAC. Macclesfield District General Hospital  
MKH. Milton Keynes General Hospital  
MOR. Morriston Hospital  
MPH. Taunton & Somerset Hospital  
NCR. New Cross Hospital  
NEV. Nevill Hall Hospital  
NGS. Northern General Hospital  
NHH. North Hampshire Hospital  
NMG. North Manchester General Hospital  
NMH. North Middlesex Hospital  
NTG. University Hospital of North Tees  
NTH. Northampton General Hospital  
NUH. Ulster Hospital  
OHM. Royal Oldham Hospital  
PAH. Princess Alexandra Hospital  
PIN. Pinderfields General Hospital  
PLY. Derriford Hospital  
PMS. The Great Western Hospital  
QAP. Queen Alexandra Hospital  
QEB. Queen Elizabeth Hospital Edgbaston  
QEG. Queen Elizabeth Hospital Gateshead  
QKL. Queen Elizabeth Hospital (Kings Lynn)  
RAD. John Radcliffe Hospital  
RBE. Royal Berkshire Hospital  
RCH. Royal Cornwall Hospital  
RDE. Royal Devon & Exeter Hospital  
RED. The Alexandra Hospital  
RFH. Royal Free Hospital  
RGH. Royal Glamorgan  
RHC. Royal Hampshire County Hospital  
RLI. Royal Lancaster Infirmary  
RLU. Royal Liverpool University Hospital  
ROT. Rotherham General Hospital  
RPH. Royal Preston Hospital  
RSC. Royal Sussex County Hospital  
RSS. Royal Shrewsbury Hospital  
RSU. Royal Surrey County Hospital  
RVB. Royal Victoria Hospital  
RVN. Royal Victoria Infirmary  
SAL. Salisbury District Hospital  
SAN. Sandwell District Hospital

SCA. Scarborough General Hospital  
SCM. James Cook University Hospital  
SDG. Staffordshire General Hospital  
SEH. Southend Hospital  
SGH. Southampton General Hospital  
SHH. Stepping Hill Hospital  
SLF. Hope Hospital  
SMV. Stoke Mandeville Hospital  
SOU. Southport and Formby District General  
SPH. St Peters Hospital  
STD. South Tyneside District Hospital  
STH. St Thomas Hospital  
STM. St Marys Hospital Paddington  
STO. University Hospital of North Staffordshire  
STR. St Richards Hospital  
SUN. Sunderland Royal Hospital  
TOR. Torbay Hospital  
TRA. Trafford General Hospital  
TUN. Tunbridge Wells Hospital  
UCL. University College Hospital  
UHC. University Hospital Coventry  
UHW. University Hospital of Wales  
WAR. Warwick Hospital  
WDG. Warrington District General Hospital  
WES. Chelsea & Westminster Hospital  
WEX. Wexham Park Hospital  
WGH. Weston General Hospital  
WHC. Whipps Cross Hospital  
WHH. William Harvey Hospital  
WHI. Whiston Hospital  
WIR. Arrows Park Hospital  
WRG. Worthing Hospital  
WRX. Maelor Hospital  
WSH. West Suffolk Hospital  
WWG. West Wales General  
YDH. York District Hospital  
YEO. Yeovil District Hospital  
ENH. East and North Herts Hospital  
QEW. Queen Elizabeth II Hospital (Welwyn)

## **Group 'Y' Hospitals**

ALT. Altnagelvin Hospital  
BED. Bedford Hospital  
BLA. Royal Blackburn Hospital  
BNT. Barnet General Hospital  
BRO. Princess Royal University Hospital  
(Bromley)  
BRT. Queens Hospital  
BRY. Fairfield General Hospital  
BSL. Bassetlaw District General Hospital  
CHS. Chase Farm Hospital  
CLW. Glan Clwyd DGH Trust  
CMI. Cumberland Infirmary  
COL. Colchester General Hospital  
DER. Royal Derby Hospital  
DID. Doncaster Royal Infirmary  
DRY. University Hospital of North Durham  
GEO. St Georges Hospital  
GWE. Royal Gwent Hospital  
GWH. Queen Elizabeth Hospital Woolwich  
HIL. Hillingdon Hospital  
HOR. Horton General Hospital  
HUD. Huddersfield Royal Infirmary  
IPS. The Ipswich Hospital  
KCH. Kings College Hospital  
KGH. Kettering General Hospital  
KMH. Kings Mill Hospital  
KTH. Kingston Hospital  
LER. Leicester Royal Infirmary  
LEW. University Hospital Lewisham  
MAY. Mayday University Hospital  
MDW. Medway Maritime Hospital  
MRI. Manchester Royal Infirmary  
NDD. North Devon District Hospital  
NOB. Nobles Hospital  
NOR. Norfolk and Norwich Hospital  
NPH. Northwick Park Hospital  
NTY. North Tyneside Hospital  
NUN. George Eliot Hospital  
NWG. Newham General Hospital  
OLD. Queens Hospital Romford  
PCH. Prince Charles Hospital  
PET. Peterborough City Hospital  
PGH. Poole General Hospital  
PIL. Pilgrim Hospital

POW. Princess Of Wales Hospital  
QEQ. Queen Elizabeth the Queen Mother  
Hospital  
RUS. Russells Hall Hospital  
SCU. Scunthorpe General Hospital  
SHC. St Helier Hospital  
TGA. Tameside General Hospital  
TLF. Princess Royal Hospital Telford  
UHN. University Hospital Queens Medical  
Centre  
VIC. Victoria Hospital  
WAT. Watford General Hospital  
WDH. Dorset County Hospital  
WHT. Whittington Hospital  
WMH. Manor Hospital  
WMU. West Middlesex University Hospital  
WRC. Worcestershire Royal Hospital  
WYB. Withybush General Hospital  
WYT. Wythenshawe Hospital  
MAI. Maidstone General Hospital

## **Hospitals not contributing to analysis owing to absent or insufficient data**

KSX. Kent & Sussex Hospital  
CGH. Conquest Hospital  
CMH. Central Middlesex Hospital  
DMO. Demonstration Medical Centre  
PEH. Princess Elizabeth Hospital  
SHJ. Jersey General Hospital  
WCI. West Cumberland Infirmary  
LIS. Lister Hospital
